# Supplementary material
Source: PubMed Central journal article supplement (PMC2862604)
Supplement: Supp_Fig.pdf [file Supp_Fig.pdf]

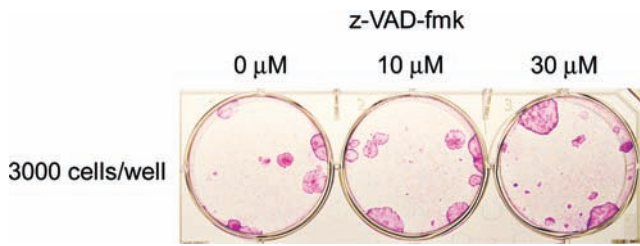

**SUPPLEMENTAL FIG. S1.** No change in colony-forming efficiencies by treating primary keratinocytes with 0, 10, or 30  $\mu\text{M}$  of a caspase inhibitor z-VAD-fmk (EMD Chemicals) for 14 days.

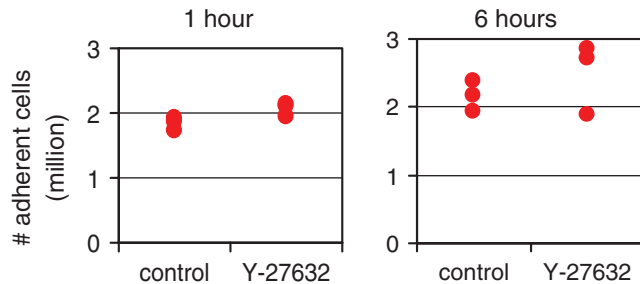

**SUPPLEMENTAL FIG. S2.** Numbers of adherent cells at 1 and 6 h after plating 5 million of epidermal cells with or without 10  $\mu\text{M}$  of Y-27632.

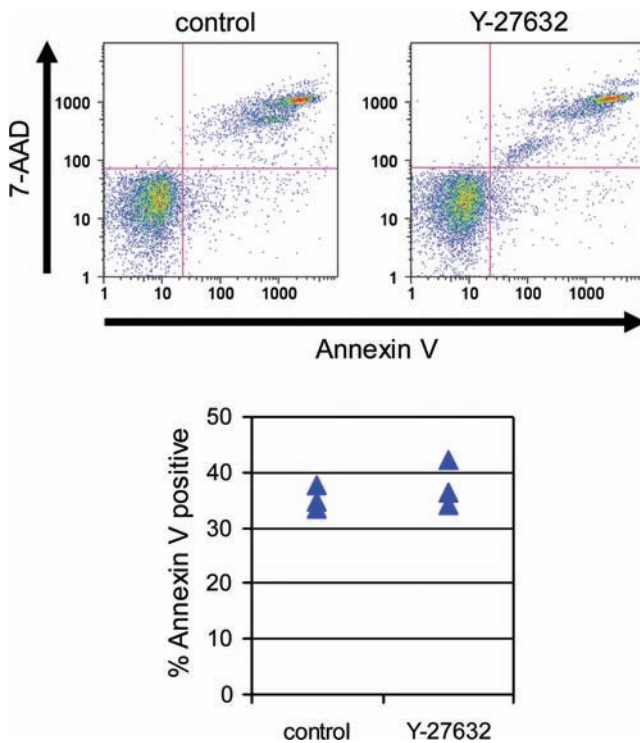

**SUPPLEMENTAL FIG. S3.** Flow cytometry analysis of apoptotic cells 24 h after starting the tissue processing in the presence or absence of Y-27632. To determine the percentage of apoptotic cells, cells in primary culture were incubated with fluorescein isothiocyanate (FITC) Annexin V and 7-Amino-Actinomycin D in Annexin V Binding Buffer (BD Biosciences). Cells were analyzed by a FACSCalibur flow cytometer (BD Biosciences).

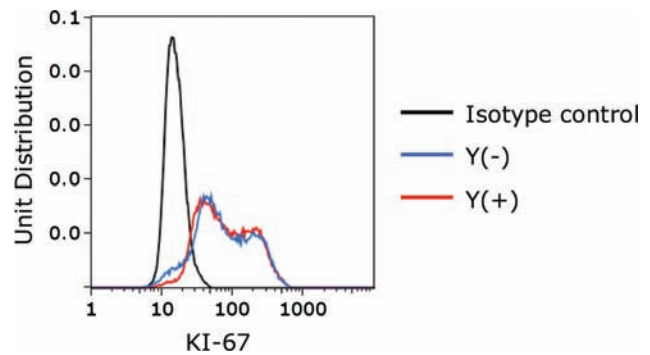

**SUPPLEMENTAL FIG. S4.** KI-67 expression after 3 days of culture in the presence or absence of Y-27632. Primary epidermal cells were harvested by trypsin-ethylenediaminetetraacetic acid. Nuclear expression of KI-67 was determined by fixing and permeabilizing cells with Cytofix/Cytoperm (BD Biosciences), and staining with R-phycoerythrin (PE)-conjugated KI-67 antibody (BD Biosciences). Cells were costained with antibodies against CD117-allophycocyanin (APC) and CD45-FITC (BD Biosciences) to exclude melanocytes and Langerhans cells, respectively. Stained cells were analyzed by a FACSCalibur flow cytometer (BD Biosciences).

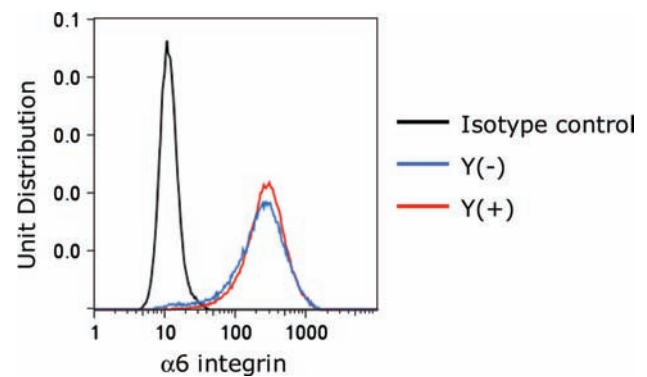

**SUPPLEMENTAL FIG. S5.** Expression levels of  $\alpha 6$  integrin after 3 days of culture in the presence or absence of Y-27632. Primary epidermal cells were harvested by trypsin-ethylenediaminetetraacetic acid. Cell surface expression of  $\alpha 6$  integrin was assessed by staining live cells with FITC-conjugated CD49f antibody (BD Biosciences). Cells were costained with antibodies against CD117-PE and CD45-PE (BD Biosciences) to exclude melanocytes and Langerhans cells, respectively. Stained cells were analyzed by a FACSCalibur flow cytometer (BD Biosciences).
